# Supplementary material for: Fe3O4@MOF core–shell magnetic microspheres as excellent catalysts for the Claisen–Schmidt condensation reaction
Source: Royal Society of Chemistry journal article supplement (doi:10.1039/c3nr05051c), 2013-11-20
Supplement: c3nr05051c.pdf [file c3nr05051c.pdf]

## Electronic Supplementary Information

# **Fe<sub>3</sub>O<sub>4</sub>@MOF core-shell magnetic microspheres as excellent catalysts for the Claisen-Schmidt condensation reaction**

Fei Ke,<sup>ab</sup> Ling-Guang Qiu<sup>\*c</sup> and Junfa Zhu<sup>\*ab</sup>

<sup>a</sup> National Synchrotron Radiation Laboratory, University of Science and Technology of China, Hefei 230029 (P.R. China)

<sup>b</sup> Department of Chemical Physics, University of Science and Technology of China, Hefei 230026 (P.R. China)

Fax: (+86)-551-5141078; E-mail: jfzhu@ustc.edu.cn

<sup>c</sup> Laboratory of Advanced Porous Materials, School of Chemistry and Chemical Engineering, Anhui University, Hefei 230039 (P.R. China)

Fax: (+86)-551-5108212; E-mail: lgqiu@ahu.edu.cn

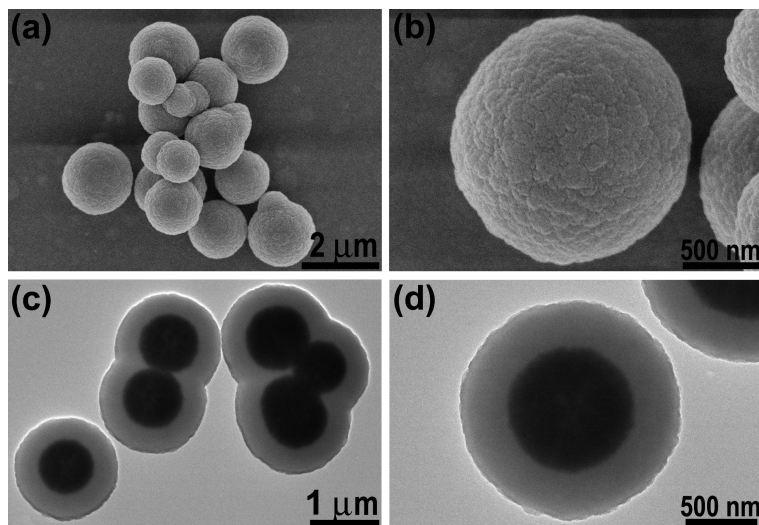

**Fig. S1** SEM images (a,b) and TEM images (c,d) of the Fe<sub>3</sub>O<sub>4</sub>@MIL-100(Fe) core-shell magnetic catalysts after the catalytic reaction.

## GC-MS spectra for Chalcones

### 1. (*E*)-Chalcone, White solid.

Micromass GCT-MS

USTC-MASS CA064

24-Jun-2013 15:28:23  
 RES=7000 half peak=0.0876  
 TOF MS EI+  
 2.54e3

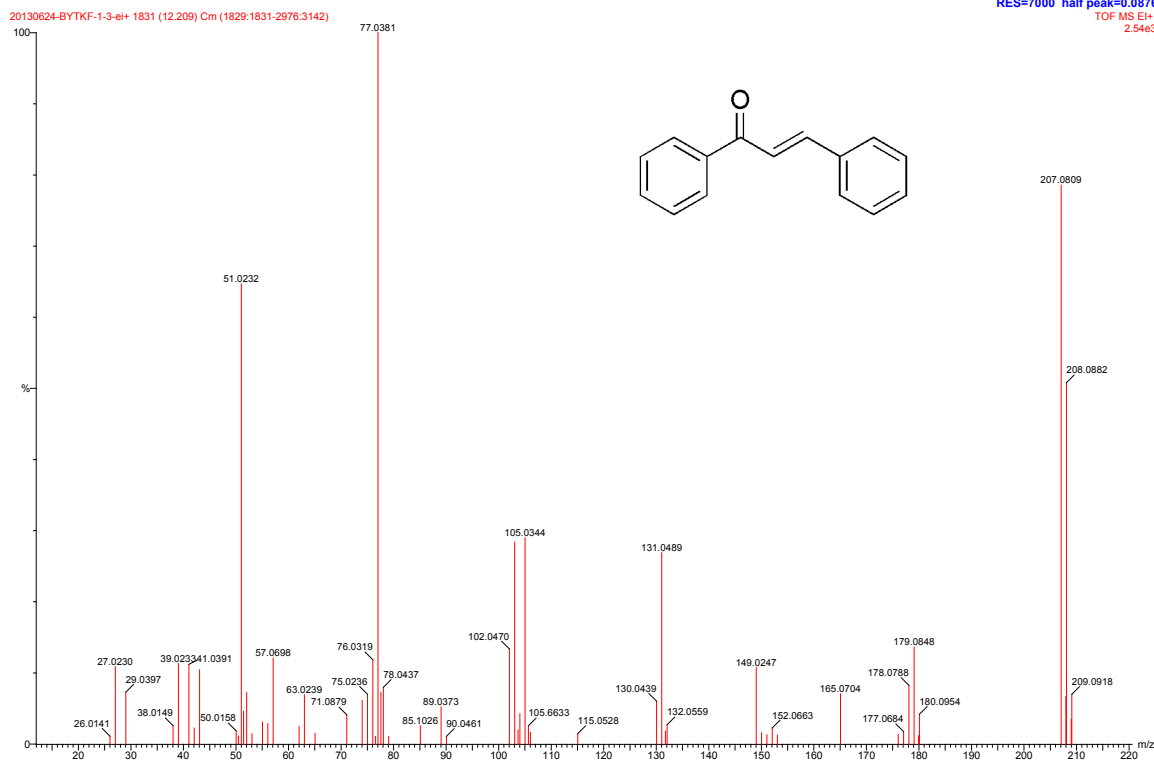

#### Elemental Composition Report

Multiple Mass Analysis: 61 mass(es) processed - displaying only valid results  
 Tolerance = 4.0 mDa / DBE: min = 0.0, max = 50.0

#### Monoisotopic Mass, Odd and Even Electron Ions

326 formula(e) evaluated with 46 results within limits (up to 50 closest results for each mass)

| Mass    | RA    | Calc. Mass | mDa  | PPM   | DBE | Formula                       |
|---------|-------|------------|------|-------|-----|-------------------------------|
| 26.0141 | 1.06  | 26.0157    | -1.6 | -59.6 | 2.0 | C <sub>2</sub> H <sub>2</sub> |
| 27.0230 | 10.82 | 27.0235    | -0.5 | -17.6 | 1.5 | C <sub>2</sub> H <sub>3</sub> |
| 29.0397 | 7.26  | 29.0391    | 0.6  | 19.8  | 0.5 | C <sub>2</sub> H <sub>5</sub> |
| 38.0149 | 2.55  | 38.0157    | -0.8 | -19.7 | 3.0 | C <sub>3</sub> H <sub>2</sub> |
| 39.0233 | 11.29 | 39.0235    | -0.2 | -4.5  | 2.5 | C <sub>3</sub> H <sub>3</sub> |
| 41.0391 | 11.17 | 41.0391    | 0.0  | -0.6  | 1.5 | C <sub>3</sub> H <sub>5</sub> |
| 42.0456 | 2.24  | 42.0470    | -1.4 | -32.1 | 1.0 | C <sub>3</sub> H <sub>6</sub> |
| 43.0537 | 10.39 | 43.0548    | -1.1 | -25.0 | 0.5 | C <sub>3</sub> H <sub>7</sub> |
| 50.0158 | 1.81  | 50.0157    | 0.1  | 3.0   | 4.0 | C <sub>4</sub> H <sub>2</sub> |
| 51.0232 | 64.64 | 51.0235    | -0.3 | -5.4  | 3.5 | C <sub>4</sub> H <sub>3</sub> |
| 52.0306 | 7.21  | 52.0313    | -0.7 | -13.5 | 3.0 | C <sub>4</sub> H <sub>4</sub> |
| 53.0391 | 1.44  | 53.0391    | 0.0  | -0.5  | 2.5 | C <sub>4</sub> H <sub>5</sub> |
| 55.0557 | 3.07  | 55.0548    | 0.9  | 16.8  | 1.5 | C <sub>4</sub> H <sub>7</sub> |
| 56.0624 | 2.83  | 56.0626    | -0.2 | -3.6  | 1.0 | C <sub>4</sub> H <sub>8</sub> |
| 57.0698 | 12.06 | 57.0704    | -0.6 | -11.0 | 0.5 | C <sub>4</sub> H <sub>9</sub> |
| 62.0169 | 2.44  | 62.0157    | 1.2  | 20.2  | 5.0 | C <sub>5</sub> H <sub>2</sub> |

|          |        |          |      |       |      |                                   |
|----------|--------|----------|------|-------|------|-----------------------------------|
| 63.0239  | 6.88   | 63.0235  | 0.4  | 6.7   | 4.5  | C <sub>5</sub> H <sub>3</sub>     |
| 65.0399  | 1.48   | 65.0391  | 0.8  | 11.9  | 3.5  | C <sub>5</sub> H <sub>5</sub>     |
| 71.0879  | 4.07   | 71.0861  | 1.8  | 25.7  | 0.5  | C <sub>5</sub> H <sub>11</sub>    |
| 74.0154  | 6.11   | 74.0157  | -0.3 | -3.4  | 6.0  | C <sub>6</sub> H <sub>2</sub>     |
| 75.0236  | 6.96   | 75.0235  | 0.1  | 1.7   | 5.5  | C <sub>6</sub> H <sub>3</sub>     |
| 76.0319  | 11.82  | 76.0313  | 0.6  | 7.9   | 5.0  | C <sub>6</sub> H <sub>4</sub>     |
| 77.0381  | 100.00 | 77.0391  | -1.0 | -13.3 | 4.5  | C <sub>6</sub> H <sub>5</sub>     |
| 78.0437  | 7.93   | 78.0470  | -3.3 | -41.6 | 4.0  | C <sub>6</sub> H <sub>6</sub>     |
| 79.0532  | 1.08   | 79.0548  | -1.6 | -19.9 | 3.5  | C <sub>6</sub> H <sub>7</sub>     |
| 85.1026  | 2.51   | 85.1017  | 0.9  | 10.3  | 0.5  | C <sub>6</sub> H <sub>13</sub>    |
| 89.0373  | 5.19   | 89.0391  | -1.8 | -20.5 | 5.5  | C <sub>7</sub> H <sub>5</sub>     |
| 90.0461  | 1.04   | 90.0470  | -0.9 | -9.4  | 5.0  | C <sub>7</sub> H <sub>6</sub>     |
| 102.0470 | 13.33  | 102.0470 | 0.0  | 0.5   | 6.0  | C <sub>8</sub> H <sub>6</sub>     |
| 103.0556 | 28.39  | 103.0548 | 0.8  | 8.0   | 5.5  | C <sub>8</sub> H <sub>7</sub>     |
| 105.0344 | 28.99  | 105.0340 | 0.4  | 3.4   | 5.5  | C <sub>7</sub> H <sub>5</sub> O   |
| 115.0528 | 1.44   | 115.0548 | -2.0 | -17.2 | 6.5  | C <sub>9</sub> H <sub>7</sub>     |
| 130.0439 | 6.00   | 130.0419 | 2.0  | 15.6  | 7.0  | C <sub>9</sub> H <sub>6</sub> O   |
| 131.0489 | 26.88  | 131.0497 | -0.8 | -6.0  | 6.5  | C <sub>9</sub> H <sub>7</sub> O   |
| 132.0559 | 2.68   | 132.0575 | -1.6 | -12.2 | 6.0  | C <sub>9</sub> H <sub>8</sub> O   |
| 151.0583 | 1.28   | 151.0548 | 3.5  | 23.3  | 9.5  | C <sub>12</sub> H <sub>7</sub>    |
| 152.0663 | 2.24   | 152.0626 | 3.7  | 24.3  | 9.0  | C <sub>12</sub> H <sub>8</sub>    |
| 153.0665 | 1.24   | 153.0704 | -3.9 | -25.6 | 8.5  | C <sub>12</sub> H <sub>9</sub>    |
| 165.0704 | 7.03   | 165.0704 | 0.0  | -0.2  | 9.5  | C <sub>13</sub> H <sub>9</sub>    |
| 176.0600 | 1.36   | 176.0626 | -2.6 | -14.8 | 11.0 | C <sub>14</sub> H <sub>8</sub>    |
| 177.0684 | 1.72   | 177.0704 | -2.0 | -11.4 | 10.5 | C <sub>14</sub> H <sub>9</sub>    |
| 178.0788 | 8.21   | 178.0783 | 0.5  | 3.1   | 10.0 | C <sub>14</sub> H <sub>10</sub>   |
| 179.0848 | 13.60  | 179.0861 | -1.3 | -7.1  | 9.5  | C <sub>14</sub> H <sub>11</sub>   |
| 180.0954 | 4.15   | 180.0939 | 1.5  | 8.3   | 9.0  | C <sub>14</sub> H <sub>12</sub>   |
| 207.0809 | 78.56  | 207.0810 | -0.1 | -0.4  | 10.5 | C <sub>15</sub> H <sub>11</sub> O |
| 208.0882 | 50.73  | 208.0888 | -0.6 | -3.0  | 10.0 | C <sub>15</sub> H <sub>12</sub> O |

2. (*E*)-1-(4-Fluorophenyl)-3-phenylprop-2-en-1-one, White solid.

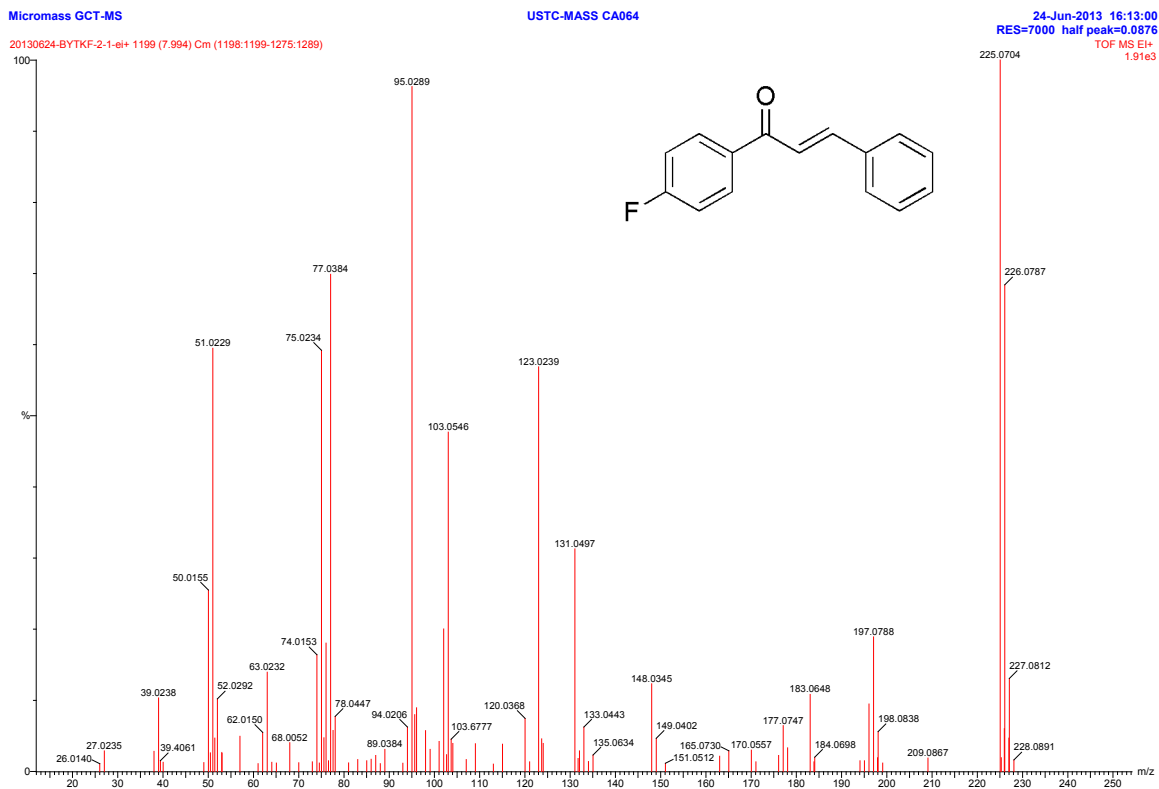

### Elemental Composition Report

Multiple Mass Analysis: 95 mass(es) processed - displaying only valid results  
 Tolerance = 4.0 mDa / DBE: min = 0.0, max = 50.0

### Monoisotopic Mass, Odd and Even Electron Ions

976 formula(e) evaluated with 66 results within limits (up to 50 closest results for each mass)

| Mass    | RA    | Calc. Mass | mDa  | PPM   | DBE | Formula                          |
|---------|-------|------------|------|-------|-----|----------------------------------|
| 26.0140 | 1.05  | 26.0157    | -1.7 | -63.4 | 2.0 | C <sub>2</sub> H <sub>2</sub>    |
| 27.0235 | 2.88  | 27.0235    | 0.0  | 0.9   | 1.5 | C <sub>2</sub> H <sub>3</sub>    |
| 38.0155 | 2.81  | 38.0157    | -0.2 | -3.9  | 3.0 | C <sub>3</sub> H <sub>2</sub>    |
| 39.0238 | 10.31 | 39.0235    | 0.3  | 8.3   | 2.5 | C <sub>3</sub> H <sub>3</sub>    |
| 40.0282 | 1.27  | 40.0313    | -3.1 | -77.4 | 2.0 | C <sub>3</sub> H <sub>4</sub>    |
| 49.0080 | 1.22  | 49.0078    | 0.2  | 3.6   | 4.5 | C <sub>4</sub> H                 |
| 50.0155 | 25.47 | 50.0157    | -0.2 | -3.0  | 4.0 | C <sub>4</sub> H <sub>2</sub>    |
| 51.0229 | 59.45 | 51.0235    | -0.6 | -11.3 | 3.5 | C <sub>4</sub> H <sub>3</sub>    |
| 52.0292 | 10.16 | 52.0313    | -2.1 | -40.4 | 3.0 | C <sub>4</sub> H <sub>4</sub>    |
| 53.0041 | 2.65  | 53.0027    | 1.4  | 25.7  | 3.5 | C <sub>3</sub> HO                |
| 53.0398 | 2.49  | 53.0391    | 0.7  | 12.7  | 2.5 | C <sub>4</sub> H <sub>5</sub>    |
| 57.0143 | 4.93  | 57.0141    | 0.2  | 4.3   | 2.5 | C <sub>3</sub> H <sub>2</sub> F  |
| 61.0069 | 1.06  | 61.0078    | -0.9 | -15.2 | 5.5 | C <sub>5</sub> H                 |
| 62.0150 | 5.46  | 62.0157    | -0.7 | -10.5 | 5.0 | C <sub>5</sub> H <sub>2</sub>    |
| 63.0232 | 13.93 | 63.0235    | -0.3 | -4.4  | 4.5 | C <sub>5</sub> H <sub>3</sub>    |
| 64.0346 | 1.27  | 64.0324    | 2.2  | 33.7  | 0.0 | C <sub>2</sub> H <sub>5</sub> OF |
| 65.0424 | 1.17  | 65.0391    | 3.3  | 50.3  | 3.5 | C <sub>5</sub> H <sub>5</sub>    |
| 68.0052 | 4.03  | 68.0062    | -1.0 | -15.1 | 4.0 | C <sub>4</sub> HF                |
| 73.0075 | 1.33  | 73.0078    | -0.3 | -4.5  | 6.5 | C <sub>6</sub> H                 |
| 74.0153 | 16.37 | 74.0157    | -0.4 | -4.7  | 6.0 | C <sub>6</sub> H <sub>2</sub>    |

|          |        |          |      |       |      |                                    |
|----------|--------|----------|------|-------|------|------------------------------------|
| 75.0234  | 59.18  | 75.0235  | -0.1 | -1.0  | 5.5  | C <sub>6</sub> H <sub>3</sub>      |
| 76.0313  | 18.01  | 76.0313  | 0.0  | 0.0   | 5.0  | C <sub>6</sub> H <sub>4</sub>      |
| 77.0384  | 69.86  | 77.0391  | -0.7 | -9.4  | 4.5  | C <sub>6</sub> H <sub>5</sub>      |
| 78.0447  | 7.71   | 78.0470  | -2.3 | -28.8 | 4.0  | C <sub>6</sub> H <sub>6</sub>      |
| 81.0135  | 1.18   | 81.0141  | -0.6 | -6.8  | 4.5  | C <sub>5</sub> H <sub>2</sub> F    |
| 83.0310  | 1.64   | 83.0297  | 1.3  | 15.6  | 3.5  | C <sub>5</sub> H <sub>4</sub> F    |
| 86.0165  | 1.70   | 86.0168  | -0.3 | -3.4  | 3.0  | C <sub>4</sub> H <sub>3</sub> OF   |
| 87.0219  | 2.23   | 87.0235  | -1.6 | -18.1 | 6.5  | C <sub>7</sub> H <sub>3</sub>      |
| 88.0291  | 1.06   | 88.0313  | -2.2 | -25.0 | 6.0  | C <sub>7</sub> H <sub>4</sub>      |
| 89.0384  | 3.07   | 89.0391  | -0.7 | -8.1  | 5.5  | C <sub>7</sub> H <sub>5</sub>      |
| 93.0126  | 1.13   | 93.0141  | -1.5 | -15.6 | 5.5  | C <sub>6</sub> H <sub>2</sub> F    |
| 94.0206  | 6.20   | 94.0219  | -1.3 | -13.6 | 5.0  | C <sub>6</sub> H <sub>3</sub> F    |
| 95.0289  | 96.23  | 95.0297  | -0.8 | -8.5  | 4.5  | C <sub>6</sub> H <sub>4</sub> F    |
| 96.0339  | 8.91   | 96.0375  | -3.6 | -37.8 | 4.0  | C <sub>6</sub> H <sub>5</sub> F    |
| 101.0407 | 4.19   | 101.0403 | 0.4  | 4.3   | 2.5  | C <sub>5</sub> H <sub>6</sub> OF   |
| 102.0464 | 20.01  | 102.0470 | -0.6 | -5.4  | 6.0  | C <sub>8</sub> H <sub>6</sub>      |
| 103.0546 | 47.67  | 103.0548 | -0.2 | -1.7  | 5.5  | C <sub>8</sub> H <sub>7</sub>      |
| 107.0299 | 1.64   | 107.0297 | 0.2  | 1.8   | 5.5  | C <sub>7</sub> H <sub>4</sub> F    |
| 109.0440 | 3.87   | 109.0454 | -1.4 | -12.4 | 4.5  | C <sub>7</sub> H <sub>6</sub> F    |
| 113.0367 | 1.01   | 113.0391 | -2.4 | -21.5 | 7.5  | C <sub>9</sub> H <sub>5</sub>      |
| 115.0544 | 3.82   | 115.0548 | -0.4 | -3.3  | 6.5  | C <sub>9</sub> H <sub>7</sub>      |
| 120.0368 | 7.42   | 120.0375 | -0.7 | -6.1  | 6.0  | C <sub>8</sub> H <sub>5</sub> F    |
| 121.0440 | 1.32   | 121.0454 | -1.4 | -11.2 | 5.5  | C <sub>8</sub> H <sub>6</sub> F    |
| 123.0239 | 56.83  | 123.0235 | 0.4  | 3.5   | 9.5  | C <sub>10</sub> H <sub>3</sub>     |
| 131.0497 | 31.27  | 131.0497 | 0.0  | 0.1   | 6.5  | C <sub>9</sub> H <sub>7</sub> O    |
| 133.0443 | 6.20   | 133.0454 | -1.1 | -7.9  | 6.5  | C <sub>9</sub> H <sub>6</sub> F    |
| 134.0551 | 1.38   | 134.0532 | 1.9  | 14.3  | 6.0  | C <sub>9</sub> H <sub>7</sub> F    |
| 135.0634 | 2.28   | 135.0610 | 2.4  | 17.7  | 5.5  | C <sub>9</sub> H <sub>8</sub> F    |
| 148.0345 | 12.31  | 148.0324 | 2.1  | 13.9  | 7.0  | C <sub>9</sub> H <sub>5</sub> OF   |
| 149.0402 | 4.61   | 149.0403 | -0.1 | -0.5  | 6.5  | C <sub>9</sub> H <sub>6</sub> OF   |
| 151.0512 | 1.11   | 151.0548 | -3.6 | -23.7 | 9.5  | C <sub>12</sub> H <sub>7</sub>     |
| 163.0539 | 2.12   | 163.0548 | -0.9 | -5.4  | 10.5 | C <sub>13</sub> H <sub>7</sub>     |
| 165.0730 | 2.87   | 165.0716 | 1.4  | 8.7   | 5.5  | C <sub>10</sub> H <sub>10</sub> OF |
| 170.0557 | 2.97   | 170.0532 | 2.5  | 14.8  | 9.0  | C <sub>12</sub> H <sub>7</sub> F   |
| 176.0663 | 2.23   | 176.0637 | 2.6  | 14.5  | 7.0  | C <sub>11</sub> H <sub>9</sub> OF  |
| 177.0747 | 6.41   | 177.0716 | 3.1  | 17.7  | 6.5  | C <sub>11</sub> H <sub>10</sub> OF |
| 178.0804 | 3.29   | 178.0794 | 1.0  | 5.7   | 6.0  | C <sub>11</sub> H <sub>11</sub> OF |
| 183.0648 | 10.80  | 183.0610 | 3.8  | 20.7  | 9.5  | C <sub>13</sub> H <sub>8</sub> F   |
| 184.0698 | 1.96   | 184.0688 | 1.0  | 5.3   | 9.0  | C <sub>13</sub> H <sub>9</sub> F   |
| 194.0539 | 1.48   | 194.0532 | 0.7  | 3.7   | 11.0 | C <sub>14</sub> H <sub>7</sub> F   |
| 195.0600 | 1.48   | 195.0610 | -1.0 | -5.1  | 10.5 | C <sub>14</sub> H <sub>8</sub> F   |
| 196.0704 | 9.46   | 196.0688 | 1.6  | 8.0   | 10.0 | C <sub>14</sub> H <sub>9</sub> F   |
| 197.0788 | 18.89  | 197.0767 | 2.1  | 10.9  | 9.5  | C <sub>14</sub> H <sub>10</sub> F  |
| 198.0838 | 5.57   | 198.0845 | -0.7 | -3.4  | 9.0  | C <sub>14</sub> H <sub>11</sub> F  |
| 225.0704 | 100.00 | 225.0716 | -1.2 | -5.2  | 10.5 | C <sub>15</sub> H <sub>10</sub> OF |
| 226.0787 | 68.34  | 226.0794 | -0.7 | -3.1  | 10.0 | C <sub>15</sub> H <sub>11</sub> OF |

3. (*E*)-1-(2-Chlorophenyl)-3-phenylprop-2-en-1-one, White solid.

Micromass GCT-MS

USTC-MASS CA064

24-Jun-2013 16:37:30  
 RES=7000 half peak=0.0876  
 TOF MS EI+  
 909

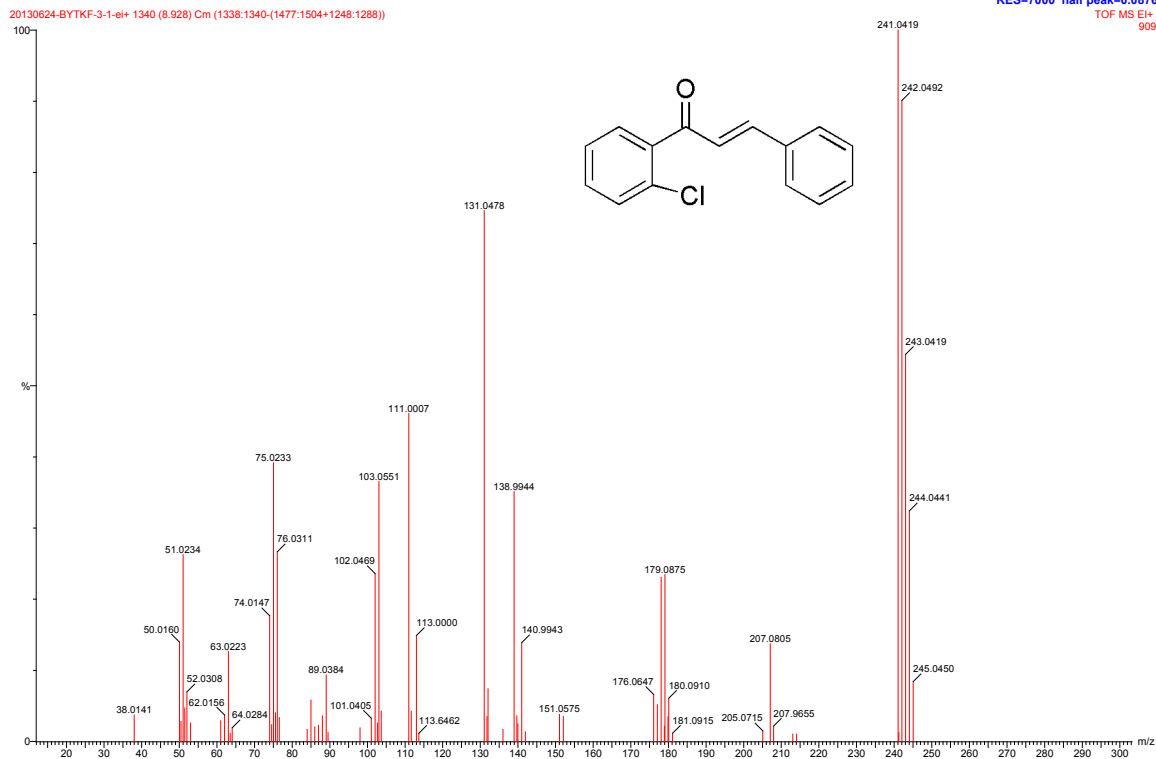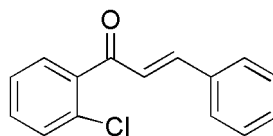

### Elemental Composition Report

Multiple Mass Analysis: 65 mass(es) processed - displaying only valid results  
 Tolerance = 4.0 mDa / DBE: min = 0.0, max = 50.0

### Monoisotopic Mass, Odd and Even Electron Ions

1128 formula(e) evaluated with 38 results within limits (up to 50 closest results for each mass)

| Mass     | RA    | Calc. Mass | mDa  | PPM   | DBE | Formula                                        |
|----------|-------|------------|------|-------|-----|------------------------------------------------|
| 38.0141  | 3.68  | 38.0157    | -1.6 | -40.8 | 3.0 | C <sub>3</sub> H <sub>2</sub>                  |
| 50.0160  | 13.94 | 50.0157    | 0.3  | 7.0   | 4.0 | C <sub>4</sub> H <sub>2</sub>                  |
| 51.0234  | 26.23 | 51.0235    | -0.1 | -1.5  | 3.5 | C <sub>4</sub> H <sub>3</sub>                  |
| 52.0308  | 6.94  | 52.0313    | -0.5 | -9.6  | 3.0 | C <sub>4</sub> H <sub>4</sub>                  |
| 53.0050  | 2.56  | 53.0027    | 2.3  | 42.6  | 3.5 | C <sub>3</sub> HO                              |
| 62.0156  | 3.68  | 62.0157    | -0.1 | -0.8  | 5.0 | C <sub>5</sub> H <sub>2</sub>                  |
| 63.0223  | 12.61 | 63.0235    | -1.2 | -18.6 | 4.5 | C <sub>5</sub> H <sub>3</sub>                  |
| 64.0284  | 1.89  | 64.0313    | -2.9 | -45.3 | 4.0 | C <sub>5</sub> H <sub>4</sub>                  |
| 74.0147  | 17.63 | 74.0157    | -1.0 | -12.8 | 6.0 | C <sub>6</sub> H <sub>2</sub>                  |
| 75.0233  | 39.13 | 75.0235    | -0.2 | -2.3  | 5.5 | C <sub>6</sub> H <sub>3</sub>                  |
| 76.0311  | 26.62 | 76.0313    | -0.2 | -2.6  | 5.0 | C <sub>6</sub> H <sub>4</sub>                  |
| 84.9840  | 5.79  | 84.9845    | -0.5 | -5.9  | 3.5 | C <sub>4</sub> H <sub>2</sub> <sup>35</sup> Cl |
| 86.9820  | 2.23  | 86.9816    | 0.4  | 5.1   | 3.5 | C <sub>4</sub> H <sub>2</sub> <sup>37</sup> Cl |
| 88.0309  | 3.57  | 88.0313    | -0.4 | -4.5  | 6.0 | C <sub>7</sub> H <sub>4</sub>                  |
| 89.0384  | 9.30  | 89.0391    | -0.7 | -8.1  | 5.5 | C <sub>7</sub> H <sub>5</sub>                  |
| 101.0405 | 3.24  | 101.0391   | 1.4  | 13.6  | 6.5 | C <sub>8</sub> H <sub>5</sub>                  |
| 102.0469 | 23.55 | 102.0470   | -0.1 | -0.5  | 6.0 | C <sub>8</sub> H <sub>6</sub>                  |
| 103.0551 | 36.53 | 103.0548   | 0.3  | 3.2   | 5.5 | C <sub>8</sub> H <sub>7</sub>                  |
| 111.0007 | 46.07 | 111.0002   | 0.5  | 4.9   | 4.5 | C <sub>6</sub> H <sub>4</sub> <sup>35</sup> Cl |
| 113.0000 | 14.84 | 113.0027   | -2.7 | -24.2 | 8.5 | C <sub>8</sub> HO                              |

|          |        |          |      |       |      |                                                                    |
|----------|--------|----------|------|-------|------|--------------------------------------------------------------------|
| 131.0478 | 74.59  | 131.0497 | -1.9 | -14.4 | 6.5  | C <sub>9</sub> H <sub>7</sub> O                                    |
| 132.0503 | 7.38   | 132.0520 | -1.7 | -12.7 | 2.0  | C <sub>7</sub> H <sub>11</sub> <sup>37</sup> Cl                    |
| 138.9944 | 35.11  | 138.9951 | -0.7 | -4.8  | 5.5  | C <sub>7</sub> H <sub>4</sub> O <sup>35</sup> Cl                   |
| 139.9992 | 2.45   | 139.9974 | 1.8  | 13.2  | 1.0  | C <sub>5</sub> H <sub>8</sub> <sup>35</sup> Cl <sup>37</sup> Cl    |
| 140.9943 | 13.84  | 140.9921 | 2.2  | 15.5  | 5.5  | C <sub>7</sub> H <sub>4</sub> O <sup>37</sup> Cl                   |
| 141.9962 | 1.34   | 141.9999 | -3.7 | -26.4 | 5.0  | C <sub>7</sub> H <sub>5</sub> O <sup>37</sup> Cl                   |
| 151.0575 | 3.79   | 151.0548 | 2.7  | 18.0  | 9.5  | C <sub>12</sub> H <sub>7</sub>                                     |
| 176.0647 | 6.58   | 176.0626 | 2.1  | 11.9  | 11.0 | C <sub>14</sub> H <sub>8</sub>                                     |
| 177.0723 | 5.13   | 177.0704 | 1.9  | 10.6  | 10.5 | C <sub>14</sub> H <sub>9</sub>                                     |
| 178.0779 | 23.02  | 178.0783 | -0.4 | -2.0  | 10.0 | C <sub>14</sub> H <sub>10</sub>                                    |
| 179.0875 | 23.43  | 179.0861 | 1.4  | 8.0   | 9.5  | C <sub>14</sub> H <sub>11</sub>                                    |
| 207.0805 | 13.68  | 207.0810 | -0.5 | -2.4  | 10.5 | C <sub>15</sub> H <sub>11</sub> O                                  |
| 207.9655 | 2.12   | 207.9661 | -0.6 | -2.7  | 9.0  | C <sub>11</sub> H <sub>4</sub> <sup>35</sup> Cl <sup>37</sup> Cl   |
| 213.0619 | 1.00   | 213.0627 | -0.8 | -3.7  | 0.5  | C <sub>9</sub> H <sub>17</sub> O <sup>35</sup> Cl <sup>37</sup> Cl |
| 241.0419 | 100.00 | 241.0420 | -0.1 | -0.5  | 10.5 | C <sub>15</sub> H <sub>10</sub> O <sup>35</sup> Cl                 |
| 242.0492 | 90.07  | 242.0498 | -0.6 | -2.7  | 10.0 | C <sub>15</sub> H <sub>11</sub> O <sup>35</sup> Cl                 |
| 243.0419 | 54.37  | 243.0391 | 2.8  | 11.7  | 10.5 | C <sub>15</sub> H <sub>10</sub> O <sup>37</sup> Cl                 |
| 244.0441 | 32.38  | 244.0469 | -2.8 | -11.4 | 10.0 | C <sub>15</sub> H <sub>11</sub> O <sup>37</sup> Cl                 |

#### 4. (*E*)-3-Phenyl-1-(thiophen-3-yl)prop-2-en-1-one, Grey solid.

Micromass GCT-MS

USTC-MASS CA064

24-Jun-2013 17:02:14  
 RES=7000 half peak=0.0876  
 TOF MS EI+  
 5.82e3

20130624-BYTKF-4-1-ei+ 1289 (8.594) Cm (1286:1323-2240:2469)

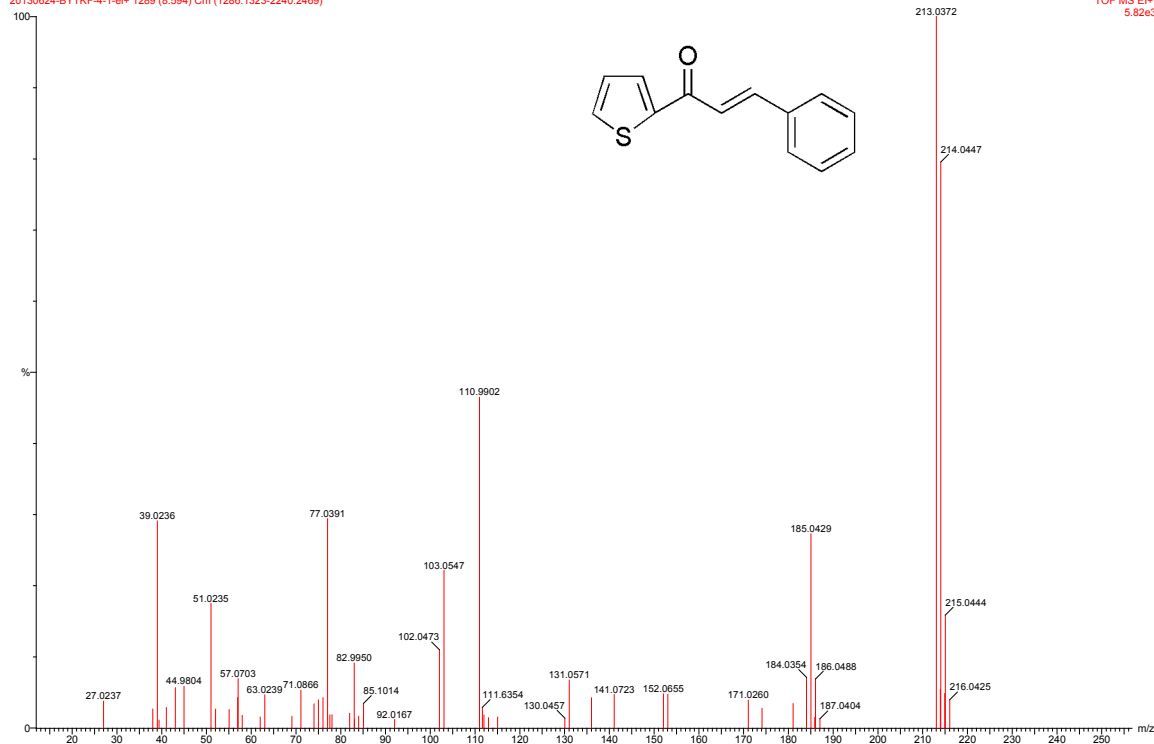

#### Elemental Composition Report

Multiple Mass Analysis: 56 mass(es) processed - displaying only valid results

Tolerance = 4.0 mDa / DBE: min = 0.0, max = 50.0

Monoisotopic Mass, Odd and Even Electron Ions

473 formula(e) evaluated with 43 results within limits (up to 50 closest results for each mass)

|          |        |     |     |      |
|----------|--------|-----|-----|------|
| Minimum: | 1.00   |     |     | 0.0  |
| Maximum: | 100.00 | 4.0 | 5.0 | 50.0 |

| Mass     | RA     | Calc. Mass | mDa  | PPM   | DBE | Formula                            |
|----------|--------|------------|------|-------|-----|------------------------------------|
| 27.0237  | 3.75   | 27.0235    | 0.2  | 8.3   | 1.5 | C <sub>2</sub> H <sub>3</sub>      |
| 38.0167  | 2.63   | 38.0157    | 1.0  | 27.6  | 3.0 | C <sub>3</sub> H <sub>2</sub>      |
| 39.0236  | 29.08  | 39.0235    | 0.1  | 3.2   | 2.5 | C <sub>3</sub> H <sub>3</sub>      |
| 41.0392  | 2.85   | 41.0391    | 0.1  | 1.8   | 1.5 | C <sub>3</sub> H <sub>5</sub>      |
| 43.0551  | 5.64   | 43.0548    | 0.3  | 7.5   | 0.5 | C <sub>3</sub> H <sub>7</sub>      |
| 44.9804  | 5.83   | 44.9799    | 0.5  | 11.2  | 1.5 | CHS                                |
| 51.0235  | 17.48  | 51.0235    | 0.0  | 0.5   | 3.5 | C <sub>4</sub> H <sub>3</sub>      |
| 52.0300  | 2.61   | 52.0313    | -1.3 | -25.0 | 3.0 | C <sub>4</sub> H <sub>4</sub>      |
| 55.0549  | 2.56   | 55.0548    | 0.1  | 2.3   | 1.5 | C <sub>4</sub> H <sub>7</sub>      |
| 56.9813  | 4.25   | 56.9799    | 1.4  | 24.6  | 2.5 | C <sub>2</sub> HS                  |
| 57.0703  | 6.89   | 57.0704    | -0.1 | -2.2  | 0.5 | C <sub>4</sub> H <sub>9</sub>      |
| 57.9881  | 1.74   | 57.9877    | 0.4  | 6.5   | 2.0 | C <sub>2</sub> H <sub>2</sub> S    |
| 62.0146  | 1.50   | 62.0157    | -1.1 | -16.9 | 5.0 | C <sub>5</sub> H <sub>2</sub>      |
| 63.0239  | 4.61   | 63.0235    | 0.4  | 6.7   | 4.5 | C <sub>5</sub> H <sub>3</sub>      |
| 69.0717  | 1.57   | 69.0704    | 1.3  | 18.5  | 1.5 | C <sub>5</sub> H <sub>9</sub>      |
| 71.0866  | 5.27   | 71.0861    | 0.5  | 7.4   | 0.5 | C <sub>5</sub> H <sub>11</sub>     |
| 74.0160  | 3.36   | 74.0157    | 0.3  | 4.7   | 6.0 | C <sub>6</sub> H <sub>2</sub>      |
| 75.0249  | 3.91   | 75.0235    | 1.4  | 19.0  | 5.5 | C <sub>6</sub> H <sub>3</sub>      |
| 76.0303  | 4.23   | 76.0313    | -1.0 | -13.2 | 5.0 | C <sub>6</sub> H <sub>4</sub>      |
| 77.0391  | 29.39  | 77.0391    | 0.0  | -0.3  | 4.5 | C <sub>6</sub> H <sub>5</sub>      |
| 78.0444  | 1.83   | 78.0470    | -2.6 | -32.7 | 4.0 | C <sub>6</sub> H <sub>6</sub>      |
| 81.9892  | 2.04   | 81.9877    | 1.5  | 18.0  | 4.0 | C <sub>4</sub> H <sub>2</sub> S    |
| 82.9950  | 9.10   | 82.9955    | -0.5 | -6.6  | 3.5 | C <sub>4</sub> H <sub>3</sub> S    |
| 83.0868  | 1.17   | 83.0861    | 0.7  | 8.7   | 1.5 | C <sub>6</sub> H <sub>11</sub>     |
| 84.0021  | 1.60   | 84.0034    | -1.3 | -15.1 | 3.0 | C <sub>4</sub> H <sub>4</sub> S    |
| 85.1014  | 3.43   | 85.1017    | -0.3 | -3.8  | 0.5 | C <sub>6</sub> H <sub>13</sub>     |
| 102.0473 | 10.96  | 102.0470   | 0.3  | 3.4   | 6.0 | C <sub>8</sub> H <sub>6</sub>      |
| 103.0547 | 22.12  | 103.0548   | -0.1 | -0.7  | 5.5 | C <sub>8</sub> H <sub>7</sub>      |
| 110.9902 | 46.45  | 110.9905   | -0.3 | -2.4  | 4.5 | C <sub>5</sub> H <sub>3</sub> OS   |
| 111.9949 | 1.78   | 111.9949   | 0.0  | -0.1  | 9.0 | C <sub>8</sub> O                   |
| 115.0537 | 1.50   | 115.0548   | -1.1 | -9.3  | 6.5 | C <sub>9</sub> H <sub>7</sub>      |
| 130.0457 | 1.34   | 130.0452   | 0.5  | 3.6   | 2.0 | C <sub>6</sub> H <sub>10</sub> OS  |
| 135.9984 | 4.21   | 135.9983   | 0.1  | 0.8   | 6.0 | C <sub>7</sub> H <sub>4</sub> OS   |
| 141.0723 | 4.68   | 141.0738   | -1.5 | -10.6 | 2.5 | C <sub>8</sub> H <sub>13</sub> S   |
| 152.0655 | 4.77   | 152.0660   | -0.5 | -3.1  | 4.0 | C <sub>9</sub> H <sub>12</sub> S   |
| 153.0700 | 4.70   | 153.0704   | -0.4 | -2.8  | 8.5 | C <sub>12</sub> H <sub>9</sub>     |
| 171.0260 | 3.86   | 171.0268   | -0.8 | -5.0  | 8.5 | C <sub>11</sub> H <sub>7</sub> S   |
| 181.0649 | 3.39   | 181.0653   | -0.4 | -2.4  | 9.5 | C <sub>13</sub> H <sub>9</sub> O   |
| 184.0354 | 7.08   | 184.0347   | 0.7  | 4.0   | 9.0 | C <sub>12</sub> H <sub>8</sub> S   |
| 185.0429 | 27.26  | 185.0425   | 0.4  | 2.2   | 8.5 | C <sub>12</sub> H <sub>9</sub> S   |
| 186.0488 | 6.84   | 186.0503   | -1.5 | -8.2  | 8.0 | C <sub>12</sub> H <sub>10</sub> S  |
| 213.0372 | 100.00 | 213.0374   | -0.2 | -1.0  | 9.5 | C <sub>13</sub> H <sub>9</sub> OS  |
| 214.0447 | 79.53  | 214.0452   | -0.5 | -2.5  | 9.0 | C <sub>13</sub> H <sub>10</sub> OS |

#### 5. 2.6-Dibenzalicyclohexanone, Yellow solid



Micromass GCT-MS

USTC-MASS CA064

25-Jun-2013 11:05:48  
 RES=7000 half peak=0.0876  
 TOF MS EI+  
 6.29e3

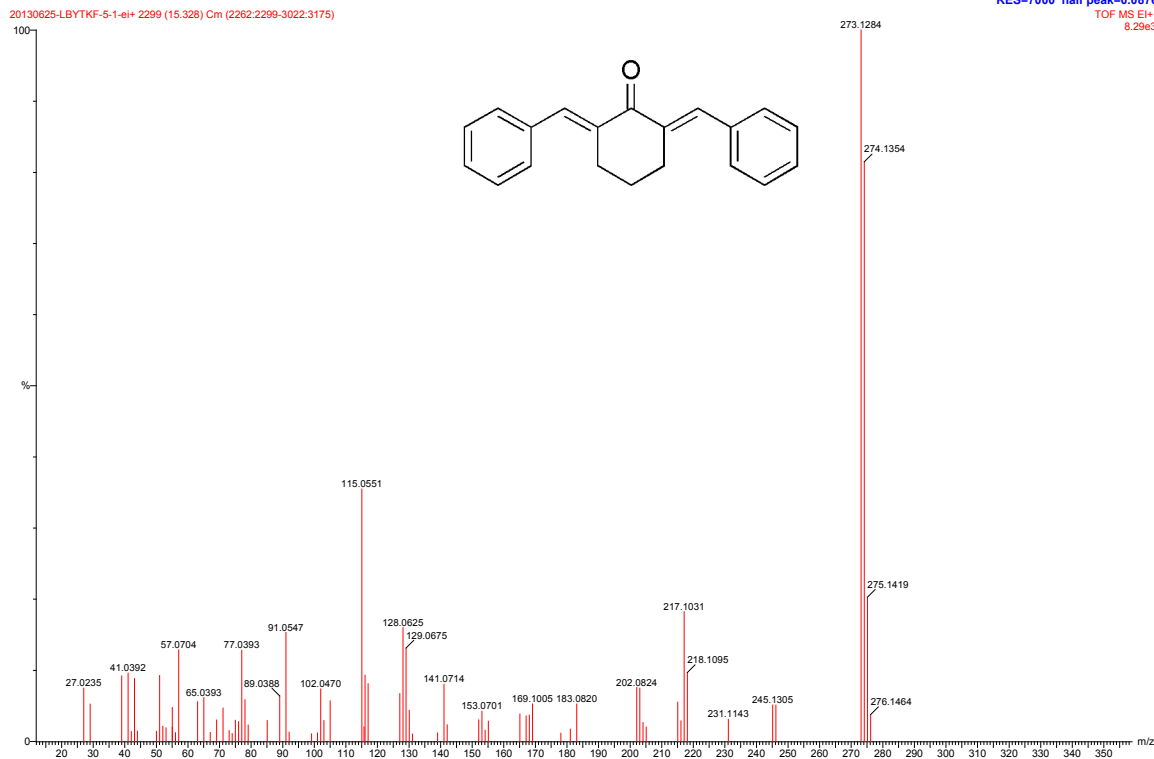

Multiple Mass Analysis: 74 mass(es) processed - displaying only valid results  
 Tolerance = 4.0 mDa / DBE: min = 0.0, max = 50.0

Monoisotopic Mass, Odd and Even Electron Ions

327 formula(e) evaluated with 64 results within limits (up to 50 closest results for each mass)

| Mass    | RA    | Calc. Mass | mDa  | PPM   | DBE | Formula                         |
|---------|-------|------------|------|-------|-----|---------------------------------|
| 27.0235 | 7.47  | 27.0235    | 0.0  | 0.9   | 1.5 | C <sub>2</sub> H <sub>3</sub>   |
| 29.0388 | 5.21  | 29.0391    | -0.3 | -11.2 | 0.5 | C <sub>2</sub> H <sub>5</sub>   |
| 39.0236 | 9.19  | 39.0235    | 0.1  | 3.2   | 2.5 | C <sub>3</sub> H <sub>3</sub>   |
| 41.0392 | 9.58  | 41.0391    | 0.1  | 1.8   | 1.5 | C <sub>3</sub> H <sub>5</sub>   |
| 42.0456 | 1.37  | 42.0470    | -1.4 | -32.1 | 1.0 | C <sub>3</sub> H <sub>6</sub>   |
| 43.0547 | 8.82  | 43.0548    | -0.1 | -1.7  | 0.5 | C <sub>3</sub> H <sub>7</sub>   |
| 50.0142 | 1.40  | 50.0157    | -1.5 | -29.0 | 4.0 | C <sub>4</sub> H <sub>2</sub>   |
| 51.0235 | 9.25  | 51.0235    | 0.0  | 0.5   | 3.5 | C <sub>4</sub> H <sub>3</sub>   |
| 52.0310 | 2.10  | 52.0313    | -0.3 | -5.8  | 3.0 | C <sub>4</sub> H <sub>4</sub>   |
| 53.0400 | 1.88  | 53.0391    | 0.9  | 16.5  | 2.5 | C <sub>4</sub> H <sub>5</sub>   |
| 55.0185 | 1.98  | 55.0184    | 0.1  | 2.0   | 2.5 | C <sub>3</sub> H <sub>3</sub> O |
| 55.0558 | 4.74  | 55.0548    | 1.0  | 18.6  | 1.5 | C <sub>4</sub> H <sub>7</sub>   |
| 56.0619 | 1.20  | 56.0626    | -0.7 | -12.5 | 1.0 | C <sub>4</sub> H <sub>8</sub>   |
| 57.0704 | 12.84 | 57.0704    | 0.0  | -0.4  | 0.5 | C <sub>4</sub> H <sub>9</sub>   |
| 63.0238 | 5.56  | 63.0235    | 0.3  | 5.2   | 4.5 | C <sub>5</sub> H <sub>3</sub>   |
| 65.0393 | 6.13  | 65.0391    | 0.2  | 2.7   | 3.5 | C <sub>5</sub> H <sub>5</sub>   |
| 67.0560 | 1.25  | 67.0548    | 1.2  | 18.3  | 2.5 | C <sub>5</sub> H <sub>7</sub>   |
| 69.0705 | 3.00  | 69.0704    | 0.1  | 1.1   | 1.5 | C <sub>5</sub> H <sub>9</sub>   |
| 71.0863 | 4.67  | 71.0861    | 0.2  | 3.2   | 0.5 | C <sub>5</sub> H <sub>11</sub>  |
| 74.0180 | 1.06  | 74.0157    | 2.3  | 31.7  | 6.0 | C <sub>6</sub> H <sub>2</sub>   |

|          |        |          |      |       |      |                                   |
|----------|--------|----------|------|-------|------|-----------------------------------|
| 75.0254  | 2.94   | 75.0235  | 1.9  | 25.7  | 5.5  | C <sub>6</sub> H <sub>3</sub>     |
| 76.0309  | 2.76   | 76.0313  | -0.4 | -5.3  | 5.0  | C <sub>6</sub> H <sub>4</sub>     |
| 77.0393  | 12.79  | 77.0391  | 0.2  | 2.3   | 4.5  | C <sub>6</sub> H <sub>5</sub>     |
| 78.0468  | 5.84   | 78.0470  | -0.2 | -1.9  | 4.0  | C <sub>6</sub> H <sub>6</sub>     |
| 79.0549  | 2.28   | 79.0548  | 0.1  | 1.6   | 3.5  | C <sub>6</sub> H <sub>7</sub>     |
| 85.1026  | 2.92   | 85.1017  | 0.9  | 10.3  | 0.5  | C <sub>6</sub> H <sub>13</sub>    |
| 89.0388  | 6.35   | 89.0391  | -0.3 | -3.7  | 5.5  | C <sub>7</sub> H <sub>5</sub>     |
| 91.0547  | 15.31  | 91.0548  | -0.1 | -0.8  | 4.5  | C <sub>7</sub> H <sub>7</sub>     |
| 92.0590  | 1.28   | 92.0626  | -3.6 | -39.1 | 4.0  | C <sub>7</sub> H <sub>8</sub>     |
| 99.1202  | 1.04   | 99.1174  | 2.8  | 28.5  | 0.5  | C <sub>7</sub> H <sub>15</sub>    |
| 101.0397 | 1.18   | 101.0391 | 0.6  | 5.7   | 6.5  | C <sub>8</sub> H <sub>5</sub>     |
| 102.0470 | 7.37   | 102.0470 | 0.0  | 0.5   | 6.0  | C <sub>8</sub> H <sub>6</sub>     |
| 103.0559 | 2.91   | 103.0548 | 1.1  | 10.9  | 5.5  | C <sub>8</sub> H <sub>7</sub>     |
| 105.0367 | 5.69   | 105.0340 | 2.7  | 25.3  | 5.5  | C <sub>7</sub> H <sub>5</sub> O   |
| 115.0551 | 35.47  | 115.0548 | 0.3  | 2.8   | 6.5  | C <sub>9</sub> H <sub>7</sub>     |
| 116.0602 | 9.28   | 116.0626 | -2.4 | -20.7 | 6.0  | C <sub>9</sub> H <sub>8</sub>     |
| 127.0559 | 6.71   | 127.0548 | 1.1  | 8.9   | 7.5  | C <sub>10</sub> H <sub>7</sub>    |
| 128.0625 | 15.99  | 128.0626 | -0.1 | -0.8  | 7.0  | C <sub>10</sub> H <sub>8</sub>    |
| 129.0675 | 13.10  | 129.0704 | -2.9 | -22.7 | 6.5  | C <sub>10</sub> H <sub>9</sub>    |
| 139.0560 | 1.17   | 139.0548 | 1.2  | 8.8   | 8.5  | C <sub>11</sub> H <sub>7</sub>    |
| 141.0714 | 8.01   | 141.0704 | 1.0  | 6.9   | 7.5  | C <sub>11</sub> H <sub>9</sub>    |
| 142.0784 | 2.32   | 142.0783 | 0.1  | 1.1   | 7.0  | C <sub>11</sub> H <sub>10</sub>   |
| 152.0629 | 3.02   | 152.0626 | 0.3  | 2.0   | 9.0  | C <sub>12</sub> H <sub>8</sub>    |
| 153.0701 | 4.22   | 153.0704 | -0.3 | -2.1  | 8.5  | C <sub>12</sub> H <sub>9</sub>    |
| 154.0765 | 1.54   | 154.0783 | -1.8 | -11.4 | 8.0  | C <sub>12</sub> H <sub>10</sub>   |
| 155.0867 | 2.82   | 155.0861 | 0.6  | 4.0   | 7.5  | C <sub>12</sub> H <sub>11</sub>   |
| 165.0719 | 3.84   | 165.0704 | 1.5  | 8.9   | 9.5  | C <sub>13</sub> H <sub>9</sub>    |
| 167.0865 | 3.56   | 167.0861 | 0.4  | 2.5   | 8.5  | C <sub>13</sub> H <sub>11</sub>   |
| 168.0923 | 3.69   | 168.0939 | -1.6 | -9.5  | 8.0  | C <sub>13</sub> H <sub>12</sub>   |
| 169.1005 | 5.25   | 169.1017 | -1.2 | -7.2  | 7.5  | C <sub>13</sub> H <sub>13</sub>   |
| 178.0807 | 1.12   | 178.0783 | 2.4  | 13.8  | 10.0 | C <sub>14</sub> H <sub>10</sub>   |
| 181.0679 | 1.72   | 181.0653 | 2.6  | 14.1  | 9.5  | C <sub>13</sub> H <sub>9</sub> O  |
| 183.0820 | 5.24   | 183.0810 | 1.0  | 5.5   | 8.5  | C <sub>13</sub> H <sub>11</sub> O |
| 203.0871 | 7.46   | 203.0861 | 1.0  | 5.0   | 11.5 | C <sub>16</sub> H <sub>11</sub>   |
| 204.0914 | 2.63   | 204.0939 | -2.5 | -12.3 | 11.0 | C <sub>16</sub> H <sub>12</sub>   |
| 205.1010 | 2.00   | 205.1017 | -0.7 | -3.5  | 10.5 | C <sub>16</sub> H <sub>13</sub>   |
| 215.0858 | 5.51   | 215.0861 | -0.3 | -1.3  | 12.5 | C <sub>17</sub> H <sub>11</sub>   |
| 216.0936 | 2.87   | 216.0939 | -0.3 | -1.4  | 12.0 | C <sub>17</sub> H <sub>12</sub>   |
| 217.1031 | 18.22  | 217.1017 | 1.4  | 6.3   | 11.5 | C <sub>17</sub> H <sub>13</sub>   |
| 218.1095 | 9.65   | 218.1096 | -0.1 | -0.2  | 11.0 | C <sub>17</sub> H <sub>14</sub>   |
| 231.1143 | 3.08   | 231.1174 | -3.1 | -13.3 | 11.5 | C <sub>18</sub> H <sub>15</sub>   |
| 245.1305 | 5.09   | 245.1330 | -2.5 | -10.3 | 11.5 | C <sub>19</sub> H <sub>17</sub>   |
| 273.1284 | 100.00 | 273.1279 | 0.5  | 1.7   | 12.5 | C <sub>20</sub> H <sub>17</sub> O |
| 274.1354 | 81.43  | 274.1358 | -0.4 | -1.3  | 12.0 | C <sub>20</sub> H <sub>18</sub> O |

6. (*E*)-1-phenyloct-1-en-3-one, White solid.

Micromass GCT-MS

USTC-MASS CA064

28-Jun-2013 15:53:26  
RES=7000 half peak=0.0876  
TOF MS EI+  
3.7663

20130628-6-1-ei+ 1136 (7.580) Cm (1130:1147-1001:1106)

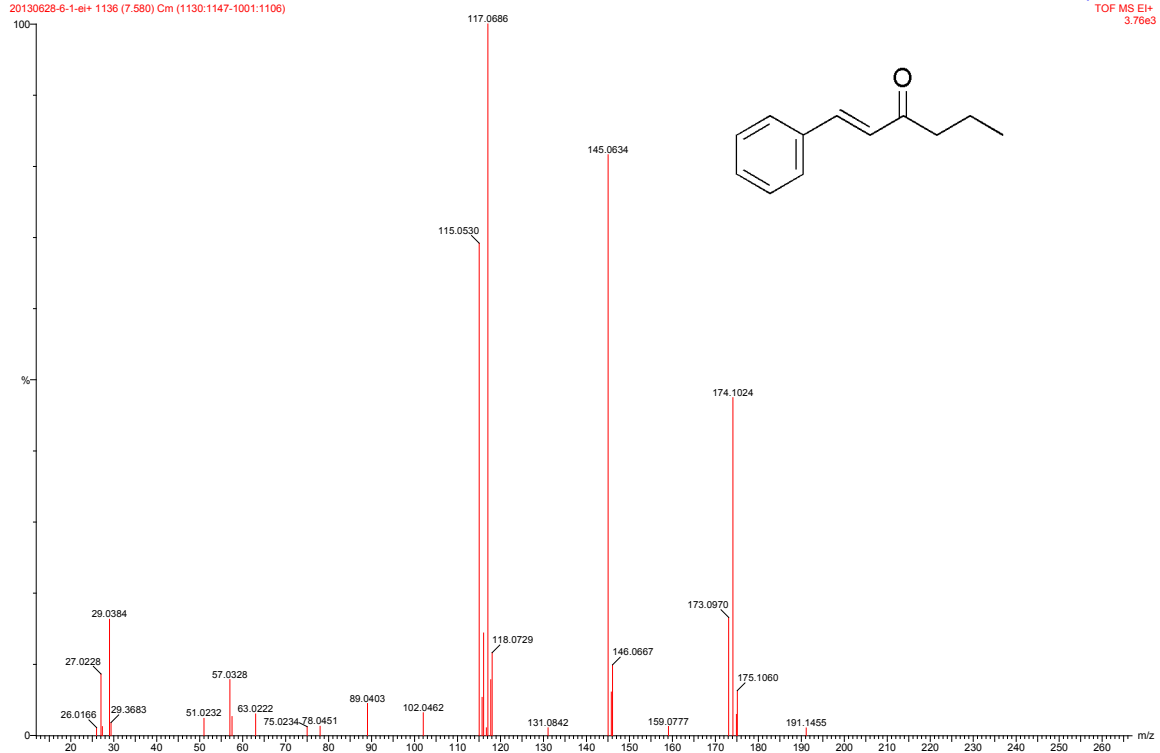

## Elemental Composition Report

Multiple Mass Analysis: 30 mass(es) processed - displaying only valid results

Tolerance = 4.0 mDa / DBE: min = 0.0, max = 50.0

### Monoisotopic Mass, Odd and Even Electron Ions

201 formula(e) evaluated with 18 results within limits (up to 50 closest results for each mass)

| Minimum: | 1.00   |            |      |       | 0.0  |                                   |
|----------|--------|------------|------|-------|------|-----------------------------------|
| Maximum: | 100.00 |            | 4.0  | 5.0   | 50.0 |                                   |
| Mass     | RA     | Calc. Mass | mDa  | PPM   | DBE  | Formula                           |
| 26.0166  | 1.06   | 26.0157    | 0.9  | 36.5  | 2.0  | C <sub>2</sub> H <sub>2</sub>     |
| 27.0228  | 8.61   | 27.0235    | -0.7 | -25.0 | 1.5  | C <sub>2</sub> H <sub>3</sub>     |
| 29.0384  | 16.30  | 29.0391    | -0.7 | -25.0 | 0.5  | C <sub>2</sub> H <sub>5</sub>     |
| 51.0232  | 2.38   | 51.0235    | -0.3 | -5.4  | 3.5  | C <sub>4</sub> H <sub>3</sub>     |
| 57.0328  | 7.83   | 57.0340    | -1.2 | -21.7 | 1.5  | C <sub>3</sub> H <sub>5</sub> O   |
| 63.0222  | 2.99   | 63.0235    | -1.3 | -20.2 | 4.5  | C <sub>5</sub> H <sub>3</sub>     |
| 75.0234  | 1.19   | 75.0235    | -0.1 | -1.0  | 5.5  | C <sub>6</sub> H <sub>3</sub>     |
| 78.0451  | 1.27   | 78.0470    | -1.9 | -23.7 | 4.0  | C <sub>6</sub> H <sub>6</sub>     |
| 89.0403  | 4.47   | 89.0391    | 1.2  | 13.2  | 5.5  | C <sub>7</sub> H <sub>5</sub>     |
| 102.0462 | 3.18   | 102.0470   | -0.8 | -7.4  | 6.0  | C <sub>8</sub> H <sub>6</sub>     |
| 115.0530 | 69.15  | 115.0548   | -1.8 | -15.4 | 6.5  | C <sub>9</sub> H <sub>7</sub>     |
| 116.0600 | 14.38  | 116.0626   | -2.6 | -22.4 | 6.0  | C <sub>9</sub> H <sub>8</sub>     |
| 117.0686 | 100.00 | 117.0704   | -1.8 | -15.6 | 5.5  | C <sub>9</sub> H <sub>9</sub>     |
| 131.0842 | 1.05   | 131.0861   | -1.9 | -14.3 | 5.5  | C <sub>10</sub> H <sub>11</sub>   |
| 145.0634 | 81.61  | 145.0653   | -1.9 | -13.4 | 6.5  | C <sub>10</sub> H <sub>9</sub> O  |
| 159.0777 | 1.24   | 159.0810   | -3.3 | -20.7 | 6.5  | C <sub>11</sub> H <sub>11</sub> O |
| 173.0970 | 16.57  | 173.0966   | 0.4  | 2.1   | 6.5  | C <sub>12</sub> H <sub>13</sub> O |
| 174.1024 | 47.46  | 174.1045   | -2.1 | -11.9 | 6.0  | C <sub>12</sub> H <sub>14</sub> O |
